# Supplementary material for: An automated platform for “on-demand” high-speed catalyst synthesis by flame spray pyrolysis
Source: Royal Society of Chemistry journal article supplement (doi:10.1039/d5dd00042d), 2025-01-01
Supplement: d5dd00042d1.pdf [file d5dd00042d1.pdf]

## Supplementary Information:

# Automated platform for “on-demand” high-speed catalyst synthesis by Flame Spray Pyrolysis†

Konstantin M. Engel<sup>a</sup>, Patrik O. Willi<sup>a</sup>, Robert N. Grass<sup>a</sup> and Wendelin J. Stark<sup>a,\*</sup>

<sup>a</sup>Functional Materials Laboratory, Institute for Chemical and Bioengineering, ETH Zürich, Vladimir-Prelog-Weg 1/1-5, 8093 Zürich, Switzerland.

\*Corresponding author: [wendelin.stark@chem.ethz.ch](mailto:wendelin.stark@chem.ethz.ch)

### 1. Experimental Methods

#### Preparation of Indium precursor

Indium precursor was made by dissolving elemental Indium (95.4 g, 99.995%, polymet.de) in HNO<sub>3</sub> (384 g, 68%, Sigma-Aldrich) and evaporating the liquid while stirring until only a slurry of In(NO<sub>3</sub>)<sub>3</sub> remained. A mixture of 100% AcOH/Ac<sub>2</sub>O (1:1 w/w, both Sigma-Aldrich) was added dropwise to the hot slurry accompanied by vivid bubbling and formation of NO<sub>x</sub>. After addition of 1200 g of the latter mixture, and keeping at 160°C for 1 h, 2-ethylhexanoic acid (292 g, 2-EHA, Acros Organics) was added. The reaction mixture was distilled with a decreasing pressure profile and end pressure of 50 mbar at 160°C to remove any remaining Ac<sub>2</sub>O and AcOH and re-dissolve any precipitated In(OAc)<sub>3</sub>. Upon cooling, the caramel-brown solution was topped up to a total mass of 830 g with a mixture of 2-EHA/tetrahydrofuran (2:1 w/w) as to achieve a final concentration of 1.0 mol kg<sup>-1</sup>.

## Parameters used for ICP-OES

Table S1: Parameters used for microwave-assisted acid digestion prior to ICP-OES.

| Batch Comp.                                        | Acid Mixture used (wt. %)                                                        | Volume of acid used | Settings        | mass of sample [mg] |
|----------------------------------------------------|----------------------------------------------------------------------------------|---------------------|-----------------|---------------------|
| In <sub>0.6</sub> Zr <sub>0.4</sub> O <sub>x</sub> | 23% H <sub>2</sub> SO <sub>4</sub> + 7% HClO <sub>4</sub> + 70% H <sub>2</sub> O | 3 ml                | 700 W<br>60 min | 10-20               |
| ZnO                                                | 30% HNO <sub>3</sub> + 70% H <sub>2</sub> O                                      |                     |                 | 30-40               |
| All other                                          | 66% H <sub>2</sub> SO <sub>4</sub> + 23% HNO <sub>3</sub> + 11% H <sub>2</sub> O |                     |                 | 20-30               |

Table S2: Parameters for the sample analysis via ICP-OES.

|                                 |       | Zn      | Zr                                                       | In      |
|---------------------------------|-------|---------|----------------------------------------------------------|---------|
| Wavelength used [nm]            |       | 213.857 | 357.685                                                  | 325.608 |
| Calibration Range [ppm]         | Lower | 0.5     | 0.5                                                      | 5       |
|                                 | Upper | 10      | 10                                                       | 100     |
| LOD in analyte [ppm]            |       | 0.13    | 1.36                                                     | 6.10    |
| LOQ in mixed metal oxide [mol%] |       | 0.08    | in ZnO: 0.16<br>in In <sub>2</sub> O <sub>3</sub> : 0.09 | 0.37    |

## 2. AutoFSP overview

Table S3: Needs and specifications determined for the design of AutoFSP.

|                                                                                                                                                                                                                                                                                                                                                                                                                                                                                                                                                                                                                                                 |
|-------------------------------------------------------------------------------------------------------------------------------------------------------------------------------------------------------------------------------------------------------------------------------------------------------------------------------------------------------------------------------------------------------------------------------------------------------------------------------------------------------------------------------------------------------------------------------------------------------------------------------------------------|
| <b>Essential:</b> <ul style="list-style-type: none"><li>• Accuracy and batch-to-batch reproducibility should be within or exceed performance of the conventional process.</li><li>• The setup must be safe to operate and automatically return to a safe state if any emergency trigger is activated.</li><li>• Production of multiple batches in a row with varying loadings and dopant types must be accomplished without carry-over of traces from one batch to another.</li><li>• Building materials must be inert to corrosivity and dissolving power of precursor solvents and heat resistant if they touch hot reaction gases.</li></ul> |
| <b>Desirable:</b> <ul style="list-style-type: none"><li>• Easy switch between conventional and automatic mode.</li><li>• Most parts used for construction are standardized or available from multiple commercial suppliers and thus replaced easily and affordably when broken.</li></ul>                                                                                                                                                                                                                                                                                                                                                       |
| <b>Useful:</b> <ul style="list-style-type: none"><li>• Minimum training required for new users.</li><li>• The entire setup must fit into the fume hood currently available in our laboratory.</li></ul>                                                                                                                                                                                                                                                                                                                                                                                                                                         |

Table S4: Overview of POU's and the programs they contain. The names of the POU's are presented as they appear in the software.

| Main Program                                                                                                                                                                       | POU_Ablauf                                                                  |                                                         | POU_Mixing_Spraying                                    |                                                                                   | POU_LoadAndSave      |                      |
|------------------------------------------------------------------------------------------------------------------------------------------------------------------------------------|-----------------------------------------------------------------------------|---------------------------------------------------------|--------------------------------------------------------|-----------------------------------------------------------------------------------|----------------------|----------------------|
| Main Program is being permanently executed, in all modes and under all conditions (supervises process parameters like T, P) and ensures communication with the connected periphery | Always On: function is continuously executed                                | Manual: contains tasks executed during manual operation | Calibration function in manual mode                    | CheckIn mixing unit at the end of a campaign                                      | Load Orders          | Save Orders          |
|                                                                                                                                                                                    | CheckOut reactor before Campaign                                            | CheckIn reactor after Campaign                          | Prepare Mixing vessels prior to starting a campaign    | Prime the precursor lines, purge any air bubbles                                  | Load Precursor Shelf | Save Precursor Shelf |
|                                                                                                                                                                                    | Ignite Flame                                                                | TurnOffFlame                                            | Abort dosing operations                                | Clean mixing vessel                                                               | Load Settings        | Save Settings        |
|                                                                                                                                                                                    | Watch Mixing Vessels: checks if a batch is ready for pyrolysis              | Spray: Supervises the pyrolysis                         | Dosing function                                        | Idle: Monitor, if a free buffer tank is available and batches left for production |                      |                      |
|                                                                                                                                                                                    | SynAlwaysOn: constantly executes base tasks required during auto operation. | MZR-calibration                                         | Idle: Mixing vessel full, but no buffer tank available | Transfer compounded precursor mixture to T1/T2                                    |                      |                      |
|                                                                                                                                                                                    | Reset Manual                                                                | Place Filter                                            | Clean T1<br>Clean T2                                   | Stirrer On T1<br>Stirrer On T2                                                    |                      |                      |

| Sample_ID | EN1 | EN2 | EN3 | EN4 | trgt_molperc1 | trgt_molperc2 | trgt_molperc3 | trgt_molperc4 | trgt_prec_conc | tot_prod_wgth | mzr_flow | O2_flow |
|-----------|-----|-----|-----|-----|---------------|---------------|---------------|---------------|----------------|---------------|----------|---------|
|           |     |     |     |     | %             | %             | %             | %             | mmol/kg        | g             | ml/min   | NL/min  |
| BEGIN     |     |     |     |     |               |               |               |               |                |               |          |         |
| 0.5ZnZr   | Zn  | Zr  |     |     | 0.5           | 99.5          | 0             | 0             | 400            | 1.4           | 5        | 5       |
| 2ZnZr     | Zn  | Zr  |     |     | 2             | 98            | 0             | 0             | 400            | 1.4           | 5        | 5       |
| 5ZnZr     | Zn  | Zr  |     |     | 5             | 95            | 0             | 0             | 400            | 1.4           | 5        | 5       |
| 10ZnZr    | Zn  | Zr  |     |     | 10            | 90            | 0             | 0             | 400            | 1.4           | 5        | 5       |
| 20ZnZr    | Zn  | Zr  |     |     | 20            | 80            | 0             | 0             | 400            | 1.4           | 5        | 5       |
| 60ZnZr    | Zn  | Zr  |     |     | 60            | 40            | 0             | 0             | 400            | 1.4           | 5        | 5       |
| 100Zn     | Zn  |     |     |     | 100           | 0             | 0             | 0             | 400            | 1.4           | 5        | 5       |
| 100Zr     | Zr  |     |     |     | 100           | 0             | 0             | 0             | 400            | 1.4           | 5        | 5       |
| END       |     |     |     |     |               |               |               |               |                |               |          |         |

Figure S1: Input file for which contains the specifications for campaign #1. The file format is “.csv” but depicted here as a table for better readability.

|          |            |      |               |           |
|----------|------------|------|---------------|-----------|
| BEGIN    |            |      |               |           |
| vlv_nmbr | elmnt_name | conc | init_fill_wgh | cnctct_OK |
| 1        | Zr         | 467  | 840           | TRUE      |
| 2        | Zn         | 506  | 340           | TRUE      |
| 3        | Zn         | 51   | 130           | TRUE      |
| 4        | Zn         | 5    | 100           | TRUE      |
| END      |            |      |               |           |

Figure S2: Input file for which contains the specifications for the precursors used in campaign #1. The file format is “.csv” but depicted here as a table for better readability.

(left half of .csv). For the other half of the



|    | A             | B               | C                | D                | E       | F      | G       | H            | I           | J         | K             |
|----|---------------|-----------------|------------------|------------------|---------|--------|---------|--------------|-------------|-----------|---------------|
| 1  | JPR_73        |                 |                  |                  |         |        |         |              |             |           |               |
| 2  | 5ZnZr_SynData |                 |                  |                  |         |        |         |              |             |           |               |
| 3  | 24.09.2024    |                 |                  |                  |         |        |         |              |             |           |               |
| 4  | Time          | T1 (inlet pump) | T3 (outlet reac) | T4 (inside reac) | pO2disp | dpFltr | Airflow | Flow_O2_disp | mzr pump ml | Mode      | Status        |
| 5  | [-]           | deg. C          | deg. C           | deg. C           | barg    | barg   | Nm^3    | NL/min       | mL/min      | [-]       | [-]           |
| 6  | 18:22:15      | 23              | 62               | 68               | 1.53    | 0      | 42.8    | 4.99         | 12          | Automatic |               |
| 7  | 18:22:20      | 23              | 54               | 62               | 1.53    | 0      | 43      | 4.99         | 5           | Automatic | OK            |
| 8  | 18:22:24      | 23              | 52               | 58               | 1.51    | 0      | 43      | 4.99         | 5           | Automatic | OK            |
| 9  | 18:22:29      | 23              | 40               | 59               | 1.48    | -0.05  | 43      | 4.99         | 5           | Automatic | OK            |
| 10 | 18:22:33      | 24              | 70               | 80               | 1.45    | -0.06  | 35.7    | 5            | 5           | Automatic | OK            |
| 11 | 18:22:38      | 24              | 83               | 103              | 1.48    | -0.06  | 35.7    | 4.99         | 5           | Automatic | OK            |
| 12 | 18:22:42      | 24              | 88               | 118              | 1.48    | -0.06  | 35.5    | 4.99         | 5           | Automatic | OK            |
| 13 | 18:22:47      | 25              | 89               | 131              | 1.47    | -0.08  | 35      | 4.99         | 5           | Automatic | OK            |
| 14 | 18:22:51      | 25              | 86               | 132              | 1.46    | -0.08  | 35.3    | 4.99         | 5           | Automatic | OK            |
| 15 | 18:22:56      | 26              | 90               | 138              | 1.48    | -0.06  | 33.6    | 5            | 5           | Automatic | OK            |
| 16 | 18:23:00      | 26              | 83               | 140              | 1.46    | -0.08  | 38.5    | 5            | 5           | Automatic | OK            |
| 17 | 18:23:05      | 27              | 93               | 146              | 1.45    | -0.08  | 31.9    | 4.99         | 5           | Automatic | OK            |
| 18 | 18:23:09      | 27              | 95               | 150              | 1.45    | -0.08  | 33.8    | 4.99         | 5           | Automatic | OK            |
| 19 | 18:23:14      | 28              | 95               | 152              | 1.45    | -0.08  | 32.9    | 4.99         | 5           | Automatic | OK            |
| 20 | 18:23:18      | 28              | 95               | 153              | 1.46    | -0.1   | 32.5    | 4.99         | 5           | Automatic | OK            |
| 21 | 18:23:23      | 29              | 95               | 156              | 1.46    | -0.1   | 31.7    | 5            | 5           | Automatic | OK            |
| 22 | 18:23:27      | 29              | 95               | 159              | 1.61    | -0.11  | 31.3    | 5            | 0           | Automatic | pDisp O2 warn |
| 23 | 18:23:32      | 30              | 78               | 141              | 1.63    | -0.08  | 30.6    | 5            | 0           | Automatic | pDisp O2 warn |
| 24 | 18:23:36      | 30              | 58               | 118              | 1.55    | -0.08  | 30.8    | 4.99         | 0           | Automatic | pDisp O2 warn |
| 25 | 18:23:41      | 31              | 54               | 104              | 1.55    | -0.08  | 31.9    | 4.99         | 0           | Automatic | pDisp O2 warn |
| 26 | 18:23:45      | 32              | 52               | 91               | 1.55    | -0.08  | 31.8    | 4.99         | 0           | Automatic | pDisp O2 warn |
| 27 | 18:23:50      | 32              | 51               | 84               | 1.55    | -0.08  | 32      | 4.99         | 0           | Automatic | pDisp O2 warn |
| 28 | 18:23:54      | 33              | 51               | 78               | 1.56    | -0.08  | 32      | 4.99         | 0           | Automatic | pDisp O2 warn |
| 29 | 18:23:59      | 34              | 50               | 74               | 1.51    | -0.08  | 31.4    | 5            | 0           | Automatic | pDisp O2 warn |
| 30 | 18:24:03      | 34              | 50               | 70               | 1.53    | -0.08  | 31.5    | 4.99         | 0           | Automatic | pDisp O2 warn |
| 31 | 18:24:07      | 35              | 49               | 68               | 1.53    | -0.08  | 31.7    | 4.99         | 0           | Automatic | pDisp O2 warn |
| 32 | 18:24:12      | 36              | 49               | 67               | 1.55    | -0.08  | 31.6    | 4.99         | 0           | Automatic | pDisp O2 warn |
| 33 | 18:24:16      | 36              | 49               | 66               | 1.55    | -0.08  | 31.6    | 4.99         | 0           | Automatic | pDisp O2 warn |
| 34 | 18:24:21      | 37              | 49               | 65               | 1.55    | -0.08  | 31.2    | 4.99         | 0           | Automatic | pDisp O2 warn |
| 35 | 18:24:25      | 37              | 49               | 64               | 1.55    | -0.08  | 31.2    | 5            | 0           | Automatic | pDisp O2 warn |
| 36 | 18:24:30      | 37              | 49               | 64               | 1.55    | -0.08  | 31.3    | 5            | 0           | Automatic | pDisp O2 warn |
| 37 | 18:24:34      | 37              | 48               | 63               | 1.55    | -0.08  | 31.2    | 4.99         | 0           | Automatic | pDisp O2 warn |
| 38 | 18:24:39      | 38              | 48               | 63               | 1.55    | -0.08  | 31.2    | 4.99         | 12          | Automatic | pDisp O2 warn |
| 39 | 18:24:43      | 38              | 48               | 63               | 1.55    | -0.08  | 31.3    | 4.99         | 12          | Automatic | pDisp O2 warn |
| 40 | 18:24:48      | 38              | 61               | 71               | 1.5     | -0.11  | 31.2    | 5            | 5           | Automatic | OK            |
| 41 | 18:24:52      | 38              | 83               | 102              | 1.53    | -0.13  | 29.1    | 4.99         | 5           | Automatic | OK            |
| 42 | 18:24:57      | 38              | 90               | 123              | 1.58    | -0.14  | 29      | 4.99         | 5           | Automatic | OK            |
| 43 | 18:25:01      | 38              | 91               | 136              | 1.55    | -0.15  | 29      | 4.99         | 5           | Automatic | OK            |

Figure S5: Exportable file format for process parameters. Here, the first minutes of the synthesis of  $\text{Zn}_5\text{Zr}_{95}\text{O}_y$  from campaign 3 are depicted. The complete collection of syn files can be found in the external data repository. The temperature decreases of T3 and T4 at the beginning of a pyrolysis run are the result of changing airflow patterns as the vacuum pump is ramped up. A few seconds before starting the recording, the airflow was  $<10 \text{ Nm}^3 \text{ h}^{-1}$ . Some time is required for the sensors to cool down and for the air temperatures to reach an equilibrium, as more air flows through the reactor. Before an equilibrium is reached, injection of the precursor is started. The short peak of “mzr pump ml” in the first few seconds of the recording is a relic of the cleaning procedure of the micro annular gear pump. When starting a new batch, the precursor is pumped towards the waste to remove potential leftover impurities from the hoses and to purge air bubbles. To accelerate this step, the pump rate is increased to the maximum before being adjusted to the setpoint for pyrolysis.

Furthermore, this batch is a good example for the intervention of AutoFSP if process parameters exceed their limits: After about 1 minute, there was a warning for the  $\text{O}_2$  dispersion pressure ( $p\text{O}_{2, \text{disp}}$ ). The mzr pump was turned off until the operator corrected the deviation and  $p\text{O}_{2, \text{disp}}$  was within the preset range again.



#### Considerations for the choice of materials used for vessel manufacture

The following materials were considered as candidates for vessel manufacture: stainless steel (SS316), Hastelloy®, titanium, non-elastomeric fluorinated polymers (e.g., massive, lathed PTFE), Polyoxymethylene (POM), and aluminum. Furthermore, additive manufacturing, using metallic or polymeric 3D-printing was considered.

Lathed aluminum was chosen as preferred material for various reasons:

- a) It is affordable and widely available with short lead times.
- b) It is easy to drill, lathe, cut and hollow out using standard machining tools. Threads are sufficiently strong. Fine surface features, like O-ring-grooves are reliably made.
- c) The dosing vessel permanently resides on the precision balance (readability:  $\pm 10\text{mg}$ ) and therefore needs to be sufficiently lightweight to not exceed the maximum rated capacity.
- d) It is not ferromagnetic, enabling stirring by means of a magnetic stir bar.

## Bill of materials

Table S5: Major system components and estimate cost required for the construction of both, AutoFSP and its conventional counterpart. Country Codes: DE = Germany, USA = United States of America, CH = Switzerland, FR = France, JAP = Japan, DK = Denmark, CN = China.

| Category                         | Item                                               | Detail                                         | Manufacturer                         | Cost per unit [CHF] | Units Used | Total Cost [CHF] |
|----------------------------------|----------------------------------------------------|------------------------------------------------|--------------------------------------|---------------------|------------|------------------|
| Inlet and exhaust-gas management | Vacuum pump                                        | MINK 0080D, 80 Nm <sup>3</sup> h <sup>-1</sup> | Busch Vacuum Solutions, Maulburg, DE | 4600                | 1          | 4600             |
|                                  | Heat exchanger for exhaust gas                     | GPLK 30-30-H-30                                | Funke, Gronau/Leine, DE              | 220                 | 1          | 220              |
|                                  | Stainless steel exhaust pipe                       | 316L, KF40, with connectors                    | VACOM, Grosslöbichau, DE             | 330                 | 3 m        | 1000             |
|                                  | Pressure sensor $\Delta p_{\text{filter}}$         | PE5 (-1 to 0 MPa-g and 0 to 5 MPa-g)           | Emerson Electric Co., USA            | 150                 | 1          | 150              |
|                                  | Thermo element                                     | 1.5*300                                        |                                      | 60                  | 4          | 240              |
|                                  | Inlet airflow hose                                 | Foxi Garant Pur, 45mm                          | Peter Hefti AG, Frauenfeld, CH       | 35                  | 1m         | 35               |
|                                  | Flowmeter inlet airflow                            | VA520                                          | CS Instruments, Harrislee, DE        | 1270                | 1          | 1270             |
|                                  | HEPA inlet air filter + housing                    | Megalam MG14 & CamSeal, CSL-3P3-TS-C 160       | CAMFIL AG, Oberägeri, CH             | 500                 | 1          | 500              |
| Process gas management           | Mass Flow Controllers                              | Red-y-smart series                             | Vögtlin Instruments, MuttENZ, CH     | 1483                | 3          | 4450             |
|                                  | Push-in fittings & PU-hosing for gases and liquids |                                                | Parker Legris                        | -                   | -          | 500              |
|                                  | Pressure sensors, $p_{\text{O}_2, \text{disp}}$    | PE5 (0 to 5 MPa-g)                             | Emerson Electric Co., USA            | 150                 | 1          | 150              |
| Micro-annular gear pump          | Pump for liquid precursors                         | mzr-2905                                       | hnp-Mikrosysteme, Schwerin, DE       | 5400                | 1          | 5400             |

|                       |                                             |                     |                                |       |      |        |
|-----------------------|---------------------------------------------|---------------------|--------------------------------|-------|------|--------|
| Setup build materials | Nuts, bolts, plates, flanges, strut profile |                     | stocks from inhouse workshop   | -     | -    | 3150   |
| Parts for HMI         | Computer w/ housing                         | Raspberry Pi 4      | Raspberry Inc.                 | 100   | 1    | 100    |
|                       | 12.5" touch screen                          |                     |                                | 180   | 1    | 180    |
| PLC Parts             | PLC controller                              | PFC100, 750-8100    | WAGO, Minden, DE               | 382   | 1    | 382    |
|                       | Power supply 24 VCD                         | 750-602             |                                | 14    | 2    | 28     |
|                       | 8-channel Analog In: Thermocouple           | 750-458             |                                | 243   | 1    | 243    |
|                       | 4-channel analog In, 0-10 VDC               | 750-459             |                                | 140   | 1    | 140    |
|                       | RS232/485 Interface                         | 750-652             |                                | 231   | 2    | 462    |
|                       | 4-channel analog Out, 0-10 VDC              | 750-559             |                                | 140   | 1    | 140    |
|                       | Housing                                     |                     |                                | 140   | 1    | 140    |
|                       | Emergency off switch                        |                     | Eaton, USA                     | 65    | 1    | 65     |
|                       | Power supply                                | 24VDC, 5A           |                                | 219   | 1    | 219    |
| Various electronics   | Plugs, cables, adapters                     |                     | Various                        | -     | -    | 680    |
|                       | Nanoparticle counting devide                | AeroTrak 9000       | TSI Inc., USA                  | 13165 | 1    | 13165  |
| Module Fabrication    | Machining Cost                              | Electronic Workshop | D-CHAB, ETH Zürich, Zürich, CH |       | 90 h | 2700   |
|                       | Machining Cost                              | Mechanic Workshop   |                                |       | 50 h | 1500   |
| Total                 |                                             |                     |                                |       |      | 41'207 |

Table S6: Additional costs incurred for the conversion from conventional to AutoFSP.

| Category                                 | Item                                               | Detail                              | Manufacturer                              | Est. cost unit <sup>-1</sup> [CHF] | Units Used | Total Cost [CHF] |
|------------------------------------------|----------------------------------------------------|-------------------------------------|-------------------------------------------|------------------------------------|------------|------------------|
| Microfluidic liquid valves w/ FFKM seals | Type 2/2NC                                         | SCS067A031                          | ASCO Emerson Electric Co., USA            | 235                                | 10         | 2350             |
|                                          | Type 3/2                                           | SCS067A111                          |                                           | 235                                | 3          | 705              |
|                                          | Type 3/2, ¼-28UNF                                  | 6724                                | Bürkert, Ingelfingen, DE                  | 190                                | 3          | 570              |
|                                          | Type 2/2 NC, ¼-28UNF                               |                                     |                                           | 143                                | 6          | 860              |
|                                          | Type 2/2NC, R1/8"                                  | 6011                                |                                           | 157                                | 3          | 470              |
| Pneumatic Liquid handling                | Rotary Valve                                       | PTFE Body, 10-port, 1000 µm Orifice | Advanced Microfluidics, Ecublens, CH.     | 980                                | 1          | 980              |
|                                          | Hosing, manifolds & Ferrules                       | Tubing 1/8", Ferrules: ¼"-28UNF     | Darwin Microfluidics, Paris, FR           | -                                  | -          | 1000             |
|                                          | Pressure Controller 0.05-5 MPa-g,                  | ITV1030-31F1N3                      | SMC Corp. JAP                             | 450                                | 1          | 450              |
|                                          | Type 3/2 gas valves used for vessel pressurization | VUVS                                | Festo, Esslingen, DE                      | 67                                 | 3          | 200              |
|                                          | Optical bubble sensor                              | BE-A301P                            | Panasonic Electronics, JAP                | 87                                 | 4          | 348              |
| Dosing and Mixing Vessels                | Magnetic stirring plates                           | Rotilabo M3                         | Roth AG, Arlesheim, CH                    | 100                                | 2          | 200              |
|                                          | Manufacturing of D&M vessels                       | Material Cost & Machining           | Inhouse workshop                          | -                                  | -          | 600              |
|                                          | Coating for D&M vessels                            | PTFE                                | Buser Oberflächentechnik, Wiler, CH.      | 150                                | 3          | 450              |
|                                          | PTFE Gear Pump                                     | A500S-4NP                           | Oriwen Fluidics Technology, Shanghai, PRC | 400                                | 1          | 400              |
|                                          | Cleaning Nozzles                                   | 1.35-80° H-LE                       | Danfoss, Nordborg, DK                     | 33                                 | 3          | 100              |
|                                          | Analytical Scale                                   | JJBC-1523                           | G&G, Kaarst, DE                           | 690                                | 1          | 690              |
|                                          | Various small parts                                | Cables, Plugs, Connectors           |                                           | -                                  | -          | 500              |
| PLC                                      | Power supply                                       | 750-601                             | WAGO, Minden, DE                          | 17                                 | 1          | 17               |

|                                      |                                      |                   |                                |     |   |       |
|--------------------------------------|--------------------------------------|-------------------|--------------------------------|-----|---|-------|
|                                      | 24VCD w/ fuse                        |                   |                                |     |   |       |
|                                      | 16-channel digital out, 24VDC        | 750-1504          |                                | 100 | 2 | 200   |
|                                      | 8-channel digital in/out, 24VDC      | 750-1506          |                                | 78  | 1 | 78    |
|                                      | 2-channel relay, NO                  | 750-512           |                                | 85  | 1 | 85    |
|                                      | RS232/485 Interface                  | 750-652           |                                | 231 | 1 | 231   |
|                                      | Power supply, 12VDC, 5A              | RND315-00001      | RND Power, CN                  | 8   | 1 | 8     |
| Manufacturing of Mixing unit housing | Materials, Machining, Anodizing (Al) | Mechanic Workshop | D-CHAB, ETH Zürich, Zürich, CH | -   | - | 2800  |
| Total                                |                                      |                   |                                |     |   | 13740 |

## Process times of AutoFSP during production campaign 1

Table S7: Comparison of process times required for a production of identical 8-batch campaigns in conventional and automatic mode.

| Working step                                                                              | Approximate time requirement [min] |                                  |
|-------------------------------------------------------------------------------------------|------------------------------------|----------------------------------|
|                                                                                           | Conventional Operation             | Automatic Operation              |
| Preliminary calculations + Planning Synthesis                                             | 30                                 | -                                |
| Preparing Electronic files with Syn Data                                                  | -                                  | 5                                |
| Diluting and bottling of commercial precursors                                            | 20                                 | 20                               |
| Compounding of precursor mixtures                                                         | 80 min (10 min per batch)          | -                                |
| Connection of precursors to manifold                                                      | -                                  | 5                                |
| Readying of the reactor                                                                   | 5                                  | 5                                |
| Calibration of micro annular gear pump (mzr)                                              | 15                                 | 5                                |
| Compounding + transfer + stirring of batch #1                                             |                                    | 7                                |
| Pyrolysis (5/5 flame condition, 50 mL per batch), incl. filter changes                    | 88 min (@8 batches @ 11min each)   | 88 min (8 batches @ 11min each)  |
| Time Debit (Operator needs to stay in vicinity of setup, but is free perform other tasks) | -                                  | -40 min (8 batches @ 5min each)  |
| Cleaning of the reactor body                                                              | 10                                 | 10                               |
| Cleaning & stowing of materials used (e.g., washing bottles, flushing precursor pump)     | 30                                 | 10                               |
| Documentation                                                                             | 20                                 | -                                |
| TOTAL                                                                                     | 298 min                            | 115 min (155 min w/o time debit) |
